# Supplementary material
Source: MDPI journal article supplement (https://www.mdpi.com/1996-1073/14/15/4696)
Supplement: s1 [file s1 › energies-1272797-supplementary.pdf]

An explanation of the measurement system is presented in the Supplementary Materials, as shown below:

(a)

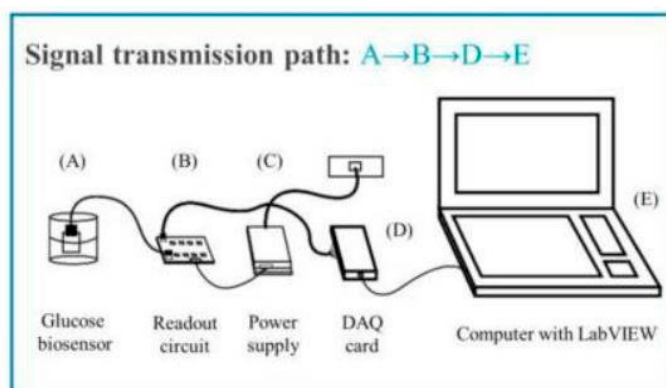

**Figure S1.** The V-T measurement of this research (a).

The V-T measurement system for the sensor in this study was the same as that in [1]. The V-T measurement system was used to investigate the sensing characteristics of the sensor. The V-T measurement system includes (A) the biosensor and solution, (B) the readout circuit, (C) the power supply, (D) the data acquisition (DAQ card), and (E) the computer with LabVIEW software. The power supply provides the power for the entire readout circuit, and it can optimize the measurement signal and eliminate noise. The data acquisition (DAQ) can convert the analog signals into digital signals. Finally, the voltage–response curves of the sensor are analyzed by LabVIEW software and displayed on the computer.

1 Chou, J. C.; Lin, S. H.; Lai, T. Y.; Kuo, P. Y.; Lai, C. H.; Nien, Y. H.; Su, T. Y., *Sensors*, A facile fabrication of a potentiometric arrayed glucose biosensor based on Nafion-GOx/GO/AZO. 2020, 20, (4), 20 pages, doi: 10.3390/s20040964
